# Supplementary material for: Klarite as a label-free SERS-based assay: a promising approach for atmospheric bioaerosol detection
Source: Royal Society of Chemistry journal article supplement (doi:10.1039/c9an01715a), 2019-11-12
Supplement: c9an01715a1.pdf [file c9an01715a1.pdf]

## Supporting Information

### **Klarite as Label-Free SERS-Based Assay: A Promising Approach for Atmospheric Bioaerosol Detection**

Muhammad Ali Tahir,<sup>a</sup> Xinlian Zhang,<sup>a</sup> Hanyun Cheng,<sup>a</sup> Xu Dong,<sup>a</sup> Yiqing Feng,<sup>a</sup> Guodong Sui,<sup>a,b</sup>  
Hongbo Fu,<sup>a</sup> Ventsislav K. Valev,<sup>c</sup> Liwu Zhang<sup>\*a,b</sup> and Jianmin Chen <sup>a,b</sup>

*<sup>a</sup> Shanghai Key Laboratory of Atmospheric Particle Pollution and Prevention, Department of Environmental Science & Engineering, Fudan University, Shanghai, 200433, Peoples' Republic of China*

*<sup>b</sup> Shanghai Institute of Pollution Control and Ecological Security, Shanghai, 200092, Peoples' Republic of China*

*<sup>c</sup> Centre for Photonics and Photonic Materials, Department of Physics, University of Bath, Claverton Down, Bath BA2 7AY, United Kingdom*

#### **Corresponding Author**

\*Liwu Zhang

Email: zhanglw@fudan.edu.cn

## **Experimental**

### **Reagents and Materials.**

All the chemicals were purchased either from Sigma Aldrich or mentioned otherwise. *Escherichia coli* (DH5 alpha) was purchased from Tiangen Biotech co. Ltd, Beijing China. HyClone phosphate buffered saline (PBS) solution was purchased from GE Healthcare Life Sciences. Klarite™ was purchased from Reinshaw Diagnostics Ltd, Glasgow, U.K. All the solutions were prepared with Milli-Q water.

### **Microorganisms Preparation.**

Shock-frozen *E.coli* (DH5 alpha) cells were separately cultivated in sterile LB medium at 200 rpm and 37 °C for 14 h. 40 mL of each of the bacterial solutions were harvested and then centrifuged at 3750 rpm for 10 min at 4 °C (Beckman Coulter Allegra X-12, Beckman Coulter, Inc., American). Afterwards, the supernatants were discarded, and pellets were washed twice with 20 mL PBS by centrifugation at 3750 rpm for 10 min at 4 °C. Finally, the resulting pellets were resuspended in PBS after vigorous shaking.

### **Characterization and Instruments.**

SEM images were taken with an accelerating voltage of 3000 V with TM-1000 (Hitachi). SERS measurements were performed with XploRA PLUS confocal spectrometer (HORIBA Scientific, France).

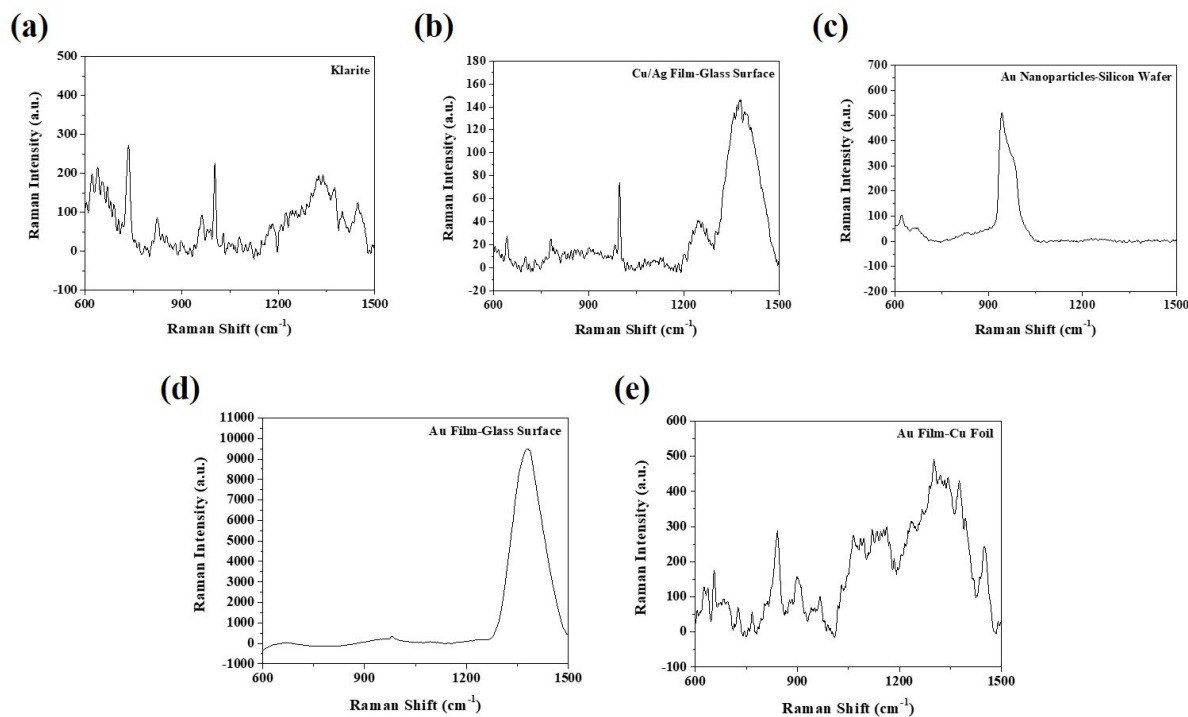

**Fig. S1.** SERS spectra of *E.coli* on (a) Klarite, (b) Cu/Ag film-glass surface, (c) Au nanoparticles-silicon wafer, (d) Au film-glass surface and (e) Au film-Cu foil. The concentration of *E.coli* used was  $1.8 \times 10^9$  cells mL<sup>-1</sup>.

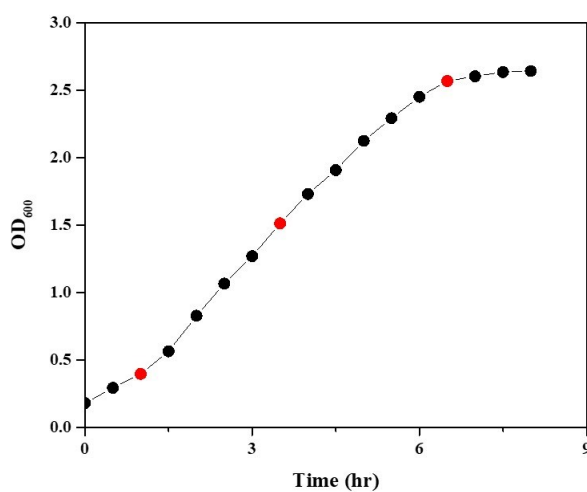

**Fig. S2.** Different growth rate was observed when *E.coli* grown to OD<sub>600</sub> 0.4, 1.5 and 2.5 and then harvested.

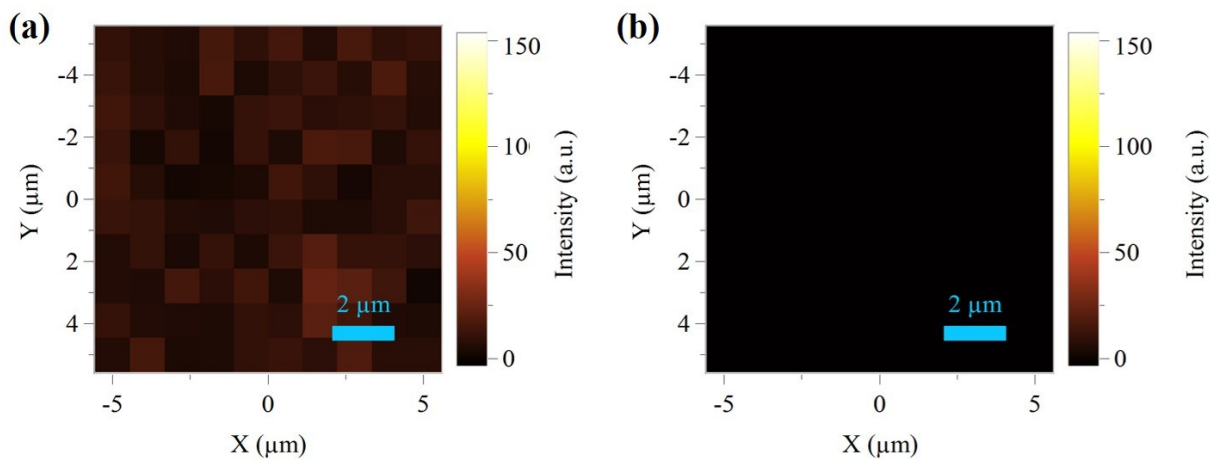

**Fig. S3.** SERS mapping of ambient bioaerosol samples. SERS mapping of (a) positive sample collected from real environment and (b) negative sample collected from air flow chamber exposed under UV light. SERS mapping performed at  $735\text{ cm}^{-1}$ . 50x objective lens was used.

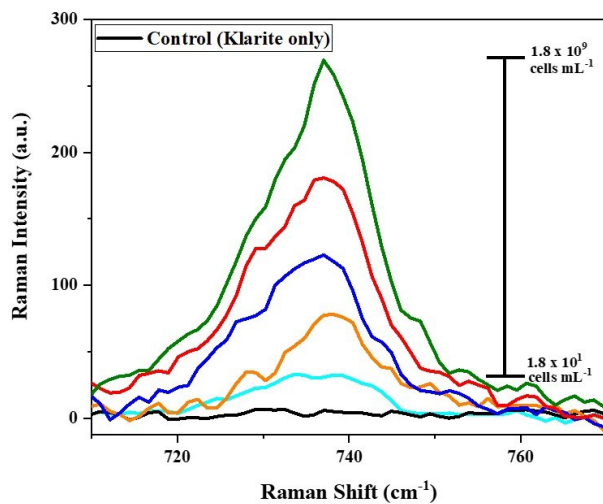

**Fig. S4.** SERS spectra of different concentrations of *E. coli* from  $1.8 \times 10^9$  to  $1.8 \times 10^1$  cells mL<sup>-1</sup>.

**Table S1.** Peaks assignment of the SERS spectra of the *E.coli*.<sup>1-7</sup>

| Raman Shift (cm <sup>-1</sup> ) | Assignment                                       |
|---------------------------------|--------------------------------------------------|
| 625                             | phe skeletal                                     |
| 652                             | $\delta(\text{COO}^-)$                           |
| 735                             | adenine, glycosidic ring mode                    |
| 805                             | $\nu(\text{CN})$                                 |
| 828                             | ring breathing Tyr                               |
| 852                             | ring breathing Tyr                               |
| 955                             | $\nu(\text{CN})$                                 |
| 1002                            | phenylalanine                                    |
| 1030                            | phenylalanine C-H in plane                       |
| 1128                            | amide III, adenine, polyadenine and DNA          |
| 1158                            | proteins                                         |
| 1210-1310                       | amide III                                        |
| 1227                            | amide III, polyadenine and DNA                   |
| 1330                            | $\nu(\text{NH}_2)$ adenine, polyadenine, DNA     |
| 1320-1340                       | DNA/RNA, Proteins                                |
| 1360-1440                       | $\nu(\text{COO}^-)$ symmetric                    |
| 1376                            | $\nu_s(\text{COO}^-)$                            |
| 1440-1460                       | $\delta(\text{CH}_2)$ saturated lipids, proteins |

$\delta$ : Bend

$\nu$ : Stretch

Tyr: Tyrosine

Phe: Phenylalanine

$\nu_s$ : Symmetric Stretch

## References

1. A. Sengupta, N. Brar and E. J. Davis, Bioaerosol detection and characterization by surface-enhanced Raman spectroscopy, *J. Colloid Interf. Sci.*, 2007, **309**, 36-43.
2. R. M. Jarvis, N. Law, I. T. Shadi, P. O'Brien, J. R. Lloyd and R. Goodacre, Surface-enhanced Raman scattering from intracellular and extracellular bacterial locations, *Anal. Chem.*, 2008, **80**, 6741-6746.
3. Y. Liu, Y.-R. Chen, X. Nou and K. Chao, Potential of surface-enhanced Raman spectroscopy for the rapid identification of *Escherichia coli* and *Listeria monocytogenes* cultures on silver colloidal nanoparticles, *Appl. Spectrosc.*, 2007, **61**, 824-831.
4. K. Maquelin, C. Kirschner, L.-P. Choo-Smith, N. van den Braak, H. P. Endtz, D. Naumann and G. Puppels, Identification of medically relevant microorganisms by vibrational spectroscopy, *J. Microbiol. Methods*, 2002, **51**, 255-271.
5. H. Zhou, D. Yang, N. P. Ivleva, N. E. Mircescu, S. r. Schubert, R. Niessner, A. Wieser and C. Haisch, Label-free in situ discrimination of live and dead bacteria by surface-enhanced Raman scattering, *Anal. Chem.*, 2015, **87**, 6553-6561.
6. M. Knauer, N. P. Ivleva, X. Liu, R. Niessner and C. Haisch, Surface-enhanced Raman scattering-based label-free microarray readout for the detection of microorganisms, *Anal. Chem.*, 2010, **82**, 2766-2772.
7. O. Samek, H. Telle, L. Harris, M. Bloomfield and D. Mack, Raman spectroscopy for rapid discrimination of *Staphylococcus epidermidis* clones related to medical device-associated infections, *Laser Phys. Lett.*, 2008, **5**, 465-470.
